# Supplementary material for: Low-dimensional nanostructures fabricated from bis(dioxaborine)carbazole derivatives as fluorescent chemosensors for detecting organic amine vapors
Source: Royal Society of Chemistry journal article supplement (doi:10.1039/c0jm04274a), 2011-01-01
Supplement: c0jm04274a.pdf [file c0jm04274a.pdf]

## Supporting Information for:

Low-dimensional nanostructures fabricated from  
bis(dioxaborine)carbazole derivatives as fluorescent  
chemosensors for detecting organic amine vapors

Xingliang Liu, Xiaofei Zhang, Ran Lu,\* Pengchong Xue, Defang Xu, Huipeng Zhou

*State Key Laboratory of Supramolecular Structure and Materials, College of  
Chemistry, Jilin University, Changchun 130012, P. R. China*

Fax: +86-431-88923907; E-Mail: [luran@mail.jlu.edu.cn](mailto:luran@mail.jlu.edu.cn)

**Table S1.** Photophysical data of **BDOBC16** in different solvents.

| Solvents      | $\lambda_{\text{abs}}$ (nm) | $\lambda_{\text{em}}$ (nm) | $\Delta\nu_{\text{st}}^{\text{a}}$ / $\text{cm}^{-1}$ |
|---------------|-----------------------------|----------------------------|-------------------------------------------------------|
| Cyclohexane   | 295, 332, 402, 397, 488     | 511                        | 922                                                   |
| Toluene       | 296, 333, 401, 463, 501     | 547                        | 1679                                                  |
| Benzene       | 295, 335, 403, 466, 504     | 552                        | 1725                                                  |
| Diethyl ether | 295, 330, 395, 457, 496     | 555                        | 2143                                                  |
| 1,4-dioxane   | 295, 333, 404, 465, 504     | 572                        | 2359                                                  |
| THF           | 296, 333, 402, 466, 504     | 592                        | 2949                                                  |
| Ethyl acetate | 295, 332, 399, 459, 500     | 589                        | 3022                                                  |
| Chloroform    | 296, 334, 404, 479, 512     | 598                        | 2808                                                  |
| DCM           | 295, 335, 404, 476, 513     | 625                        | 3493                                                  |

a.  $\Delta\nu_{\text{st}} = \nu_{\text{abs}} - \nu_{\text{em}}$ .

**Table S2:** Gelation properties of **BDOBC16** in selected organic solvents.

| <b>Solvent</b>                  | <b>BDOBC16</b> <sup>[a]</sup> | <b>CGC</b> <sup>[b]</sup> [mM] |
|---------------------------------|-------------------------------|--------------------------------|
| Hexane                          | <b>I</b>                      |                                |
| Cyclohexane                     | <b>I</b>                      |                                |
| Heptane                         | <b>I</b>                      |                                |
| Benzene                         | <b>S</b>                      |                                |
| Toluene                         | <b>S</b>                      |                                |
| Xylene                          | <b>S</b>                      |                                |
| Benzene/Hexane (v/v = 1/1)      | <b>G</b>                      | 0.6                            |
| Benzene/Cyclohexane (v/v = 1/1) | <b>G</b>                      | 0.8                            |
| Benzene/Heptane (v/v = 3/2)     | <b>G</b>                      | 0.7                            |
| Toluene/Hexane (v/v = 2/1)      | <b>G</b>                      | 0.8                            |
| Toluene/Cyclohexane (v/v = 3/2) | <b>G</b>                      | 0.9                            |
| Toluene/Heptane (v/v = 3/2)     | <b>G</b>                      | 0.5                            |
| Xylene/Hexane (v/v = 2/1)       | <b>G</b>                      | 0.8                            |
| Xylene/Heptane (v/v = 2/1)      | <b>G</b>                      | 1.0                            |
| Xylene/Cyclohexane (v/v = 3/2)  | <b>PG</b>                     |                                |
| Dichloromethane                 | <b>S</b>                      |                                |
| Chloroform                      | <b>S</b>                      |                                |
| acetonitrile                    | <b>I</b>                      |                                |
| ethanol                         | <b>I</b>                      |                                |
| THF                             | <b>S</b>                      |                                |
| DMF                             | <b>S</b>                      |                                |
| DMSO                            | <b>S</b>                      |                                |

[a] **G**: gel; **PG**: partial gelation at room temperature; **S**: soluble; **I**: insoluble.

[b] CGC is the minimum concentration required for the formation of a stable gel at room temperature.

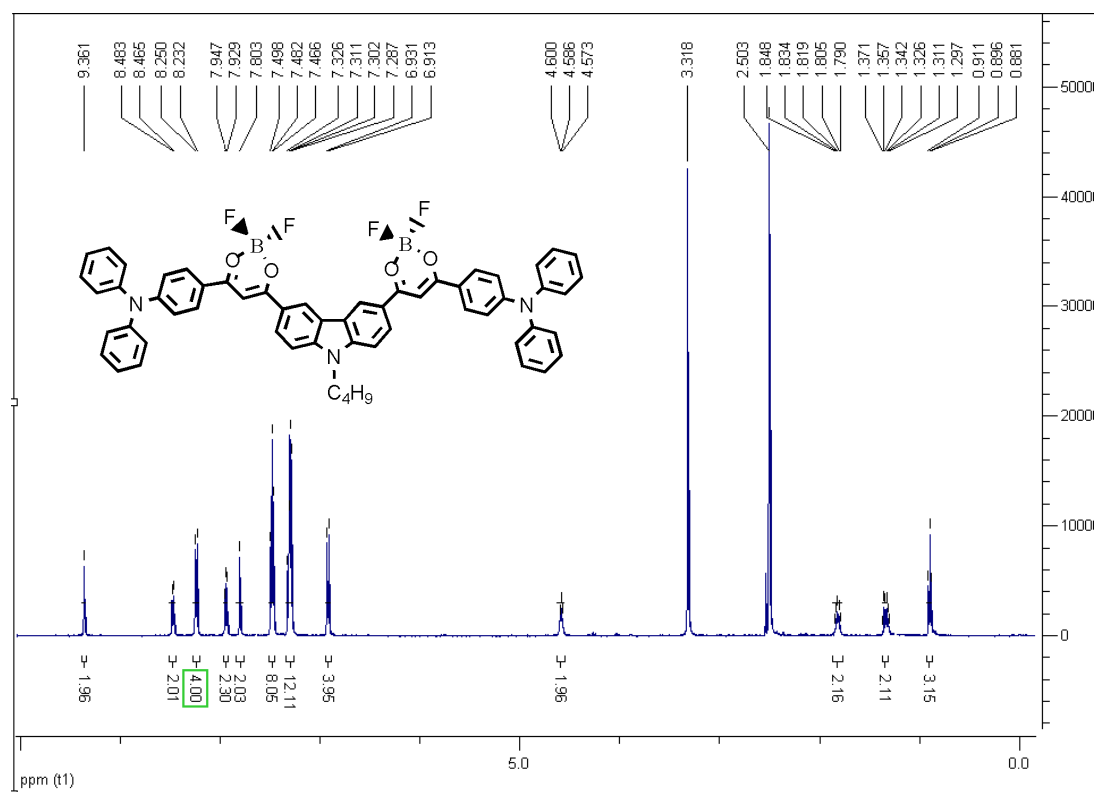

Fig. S1  $^1\text{H}$  NMR (500 MHz) spectrum of compound BDOBC4.

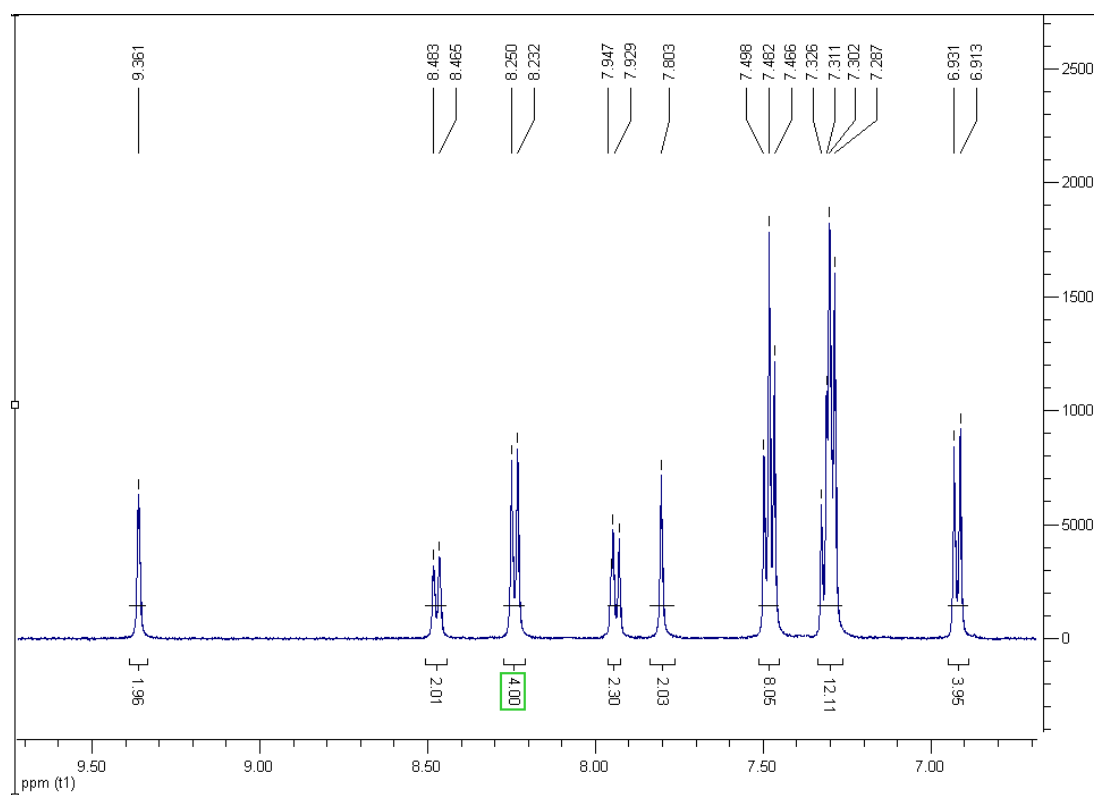

Fig. S2  $^1\text{H}$  NMR (500 MHz) spectrum of compound BDOBC4.

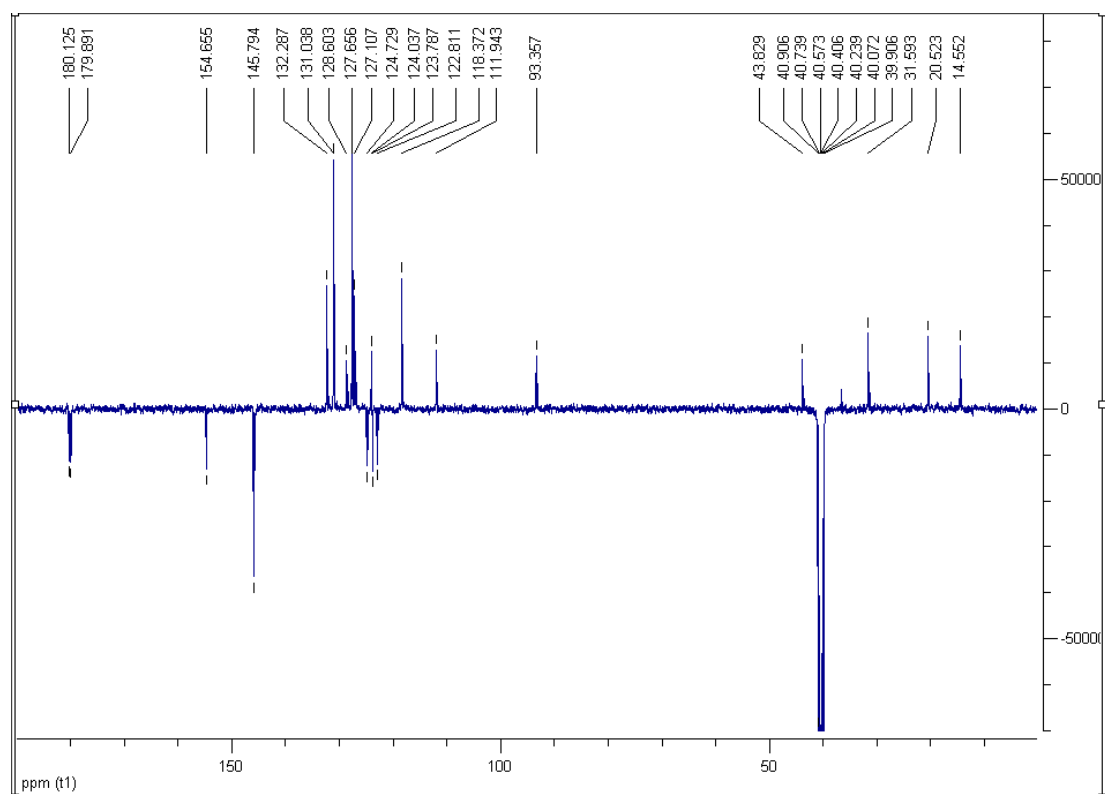

**Fig. S3**  $^{13}\text{C}$  NMR (125 MHz) spectrum of compound **BDOBC4**.

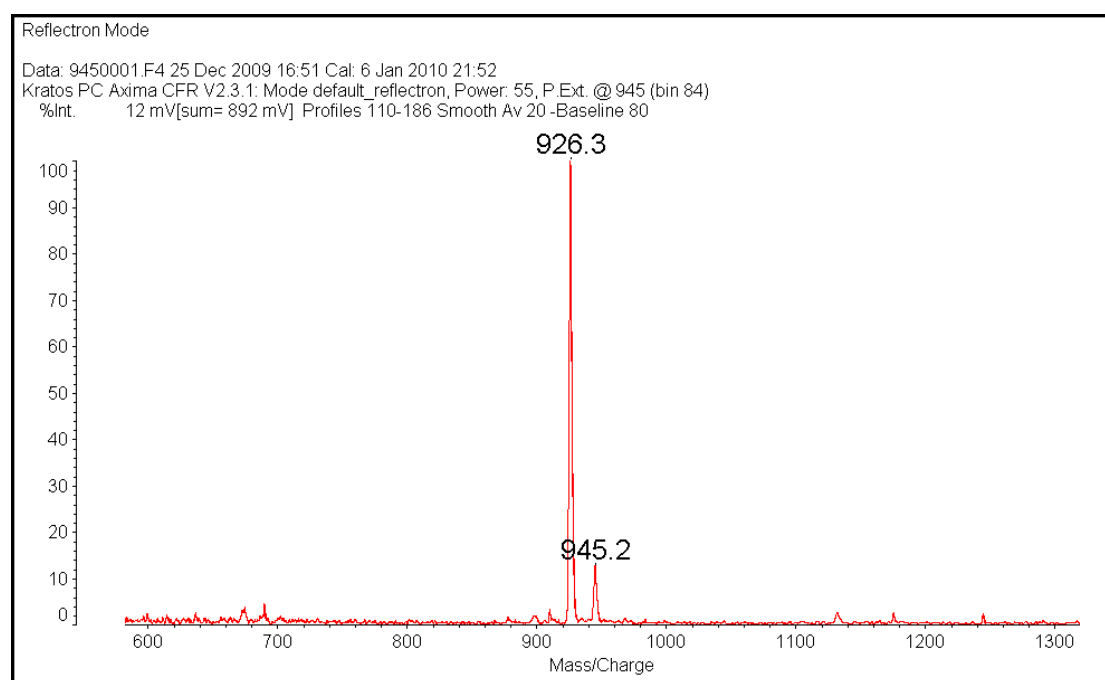

**Fig. S4** MALDI/TOF MS spectrum of compound **BDOBC4**.

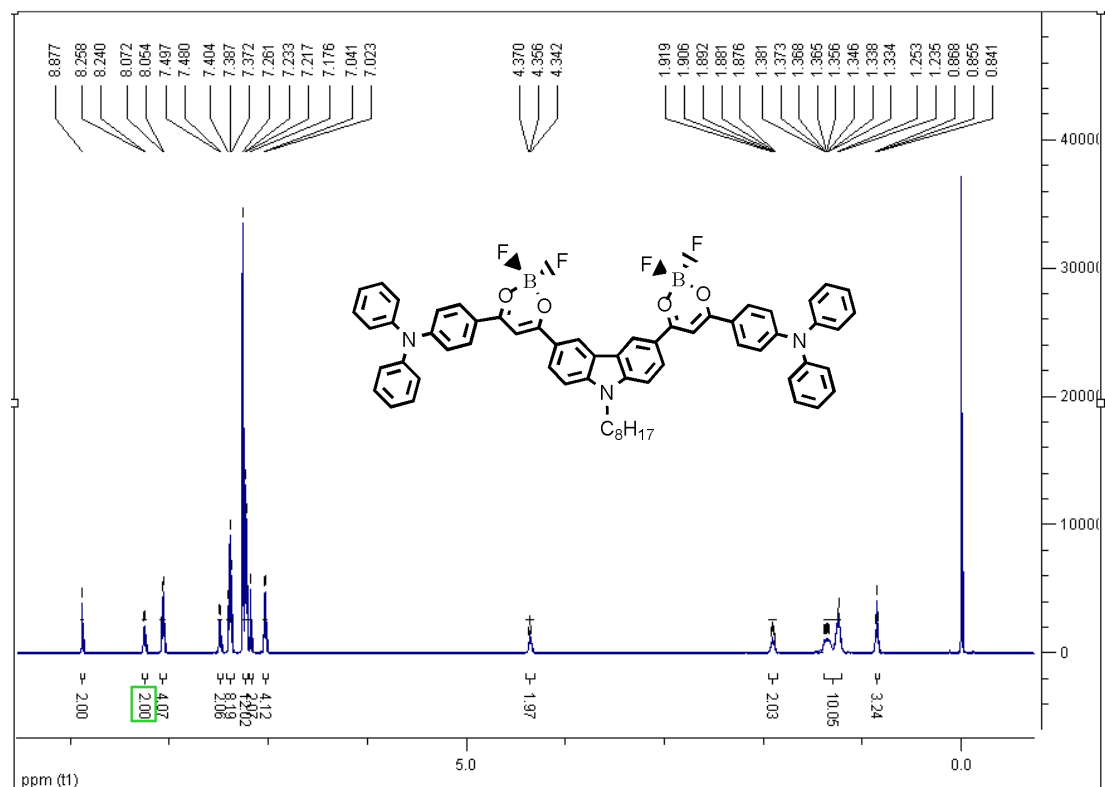

Fig. S5  $^1\text{H}$  NMR (500 MHz) spectrum of compound BDOBC8.

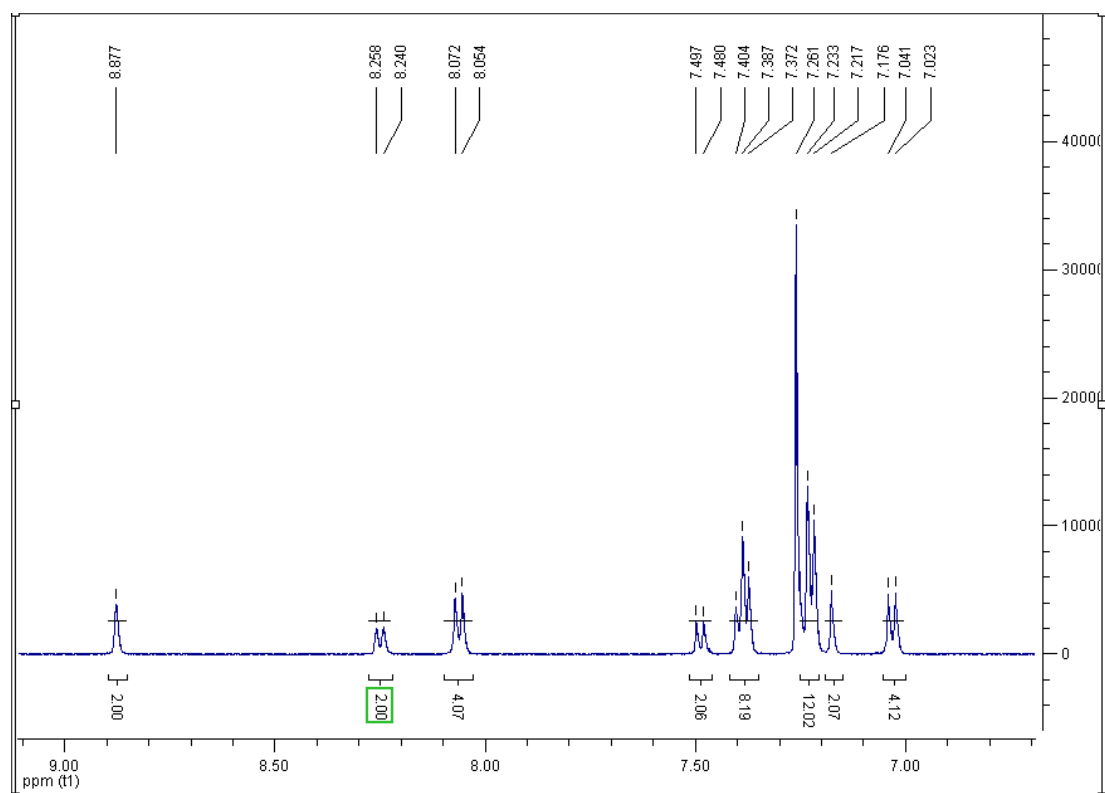

Fig. S6  $^1\text{H}$  NMR (500 MHz) spectrum of compound BDOBC8.

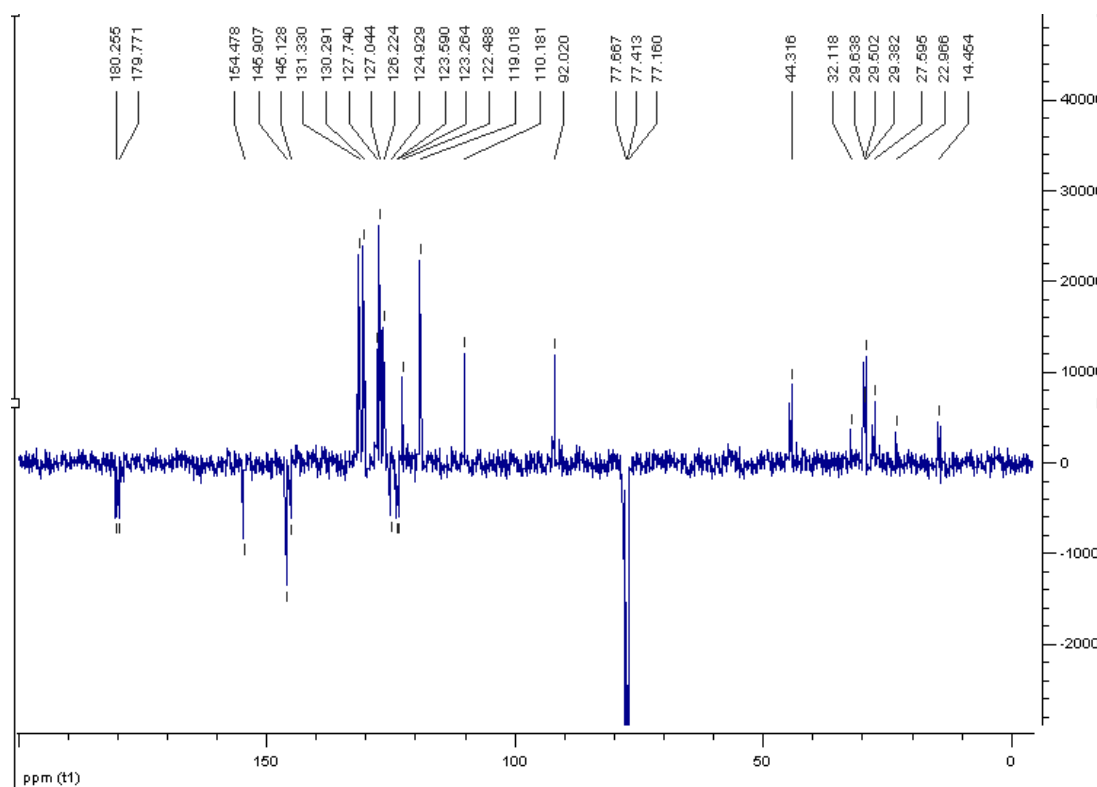

**Fig. S7**  $^{13}\text{C}$  NMR (125 MHz) spectrum of compound **BDOBC8**.

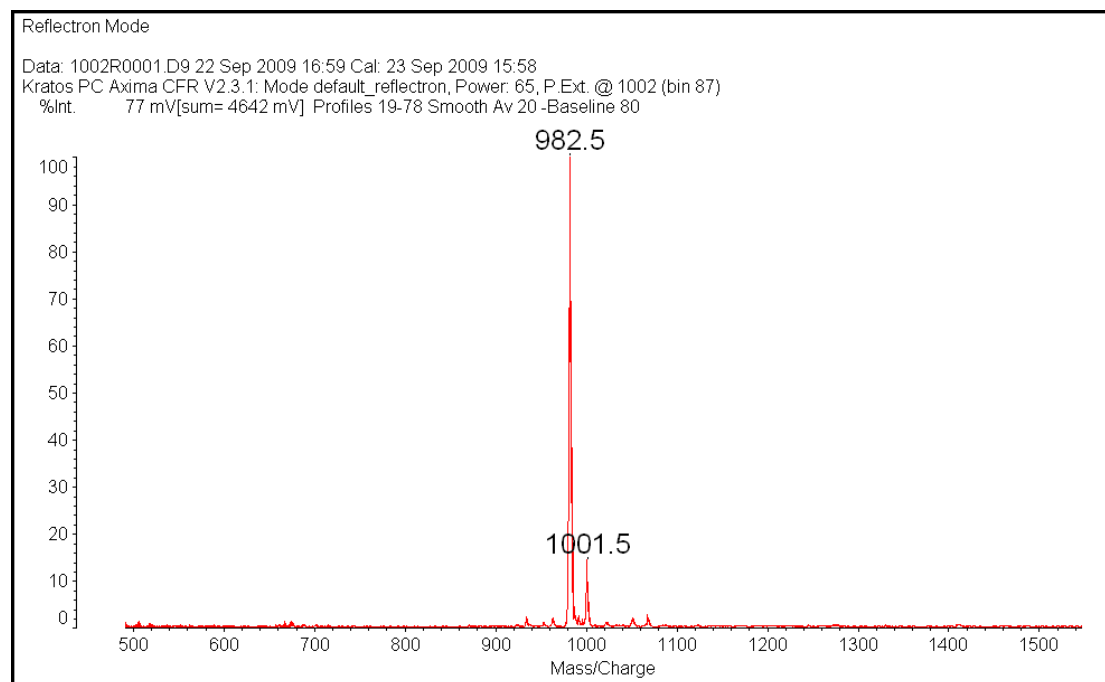

**Fig. S8** MALDI/TOF MS spectrum of compound **BDOBC8**.

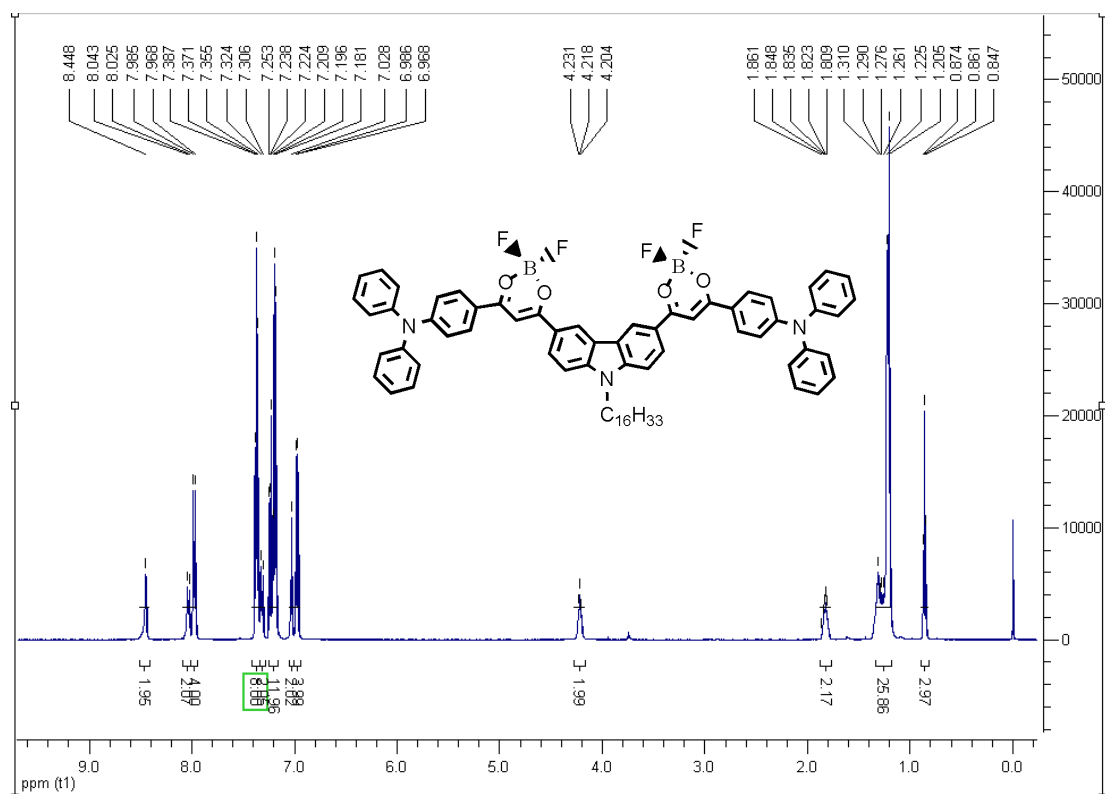

Fig. S9  $^1H$  NMR (500 MHz) spectrum of compound BDOBC16.

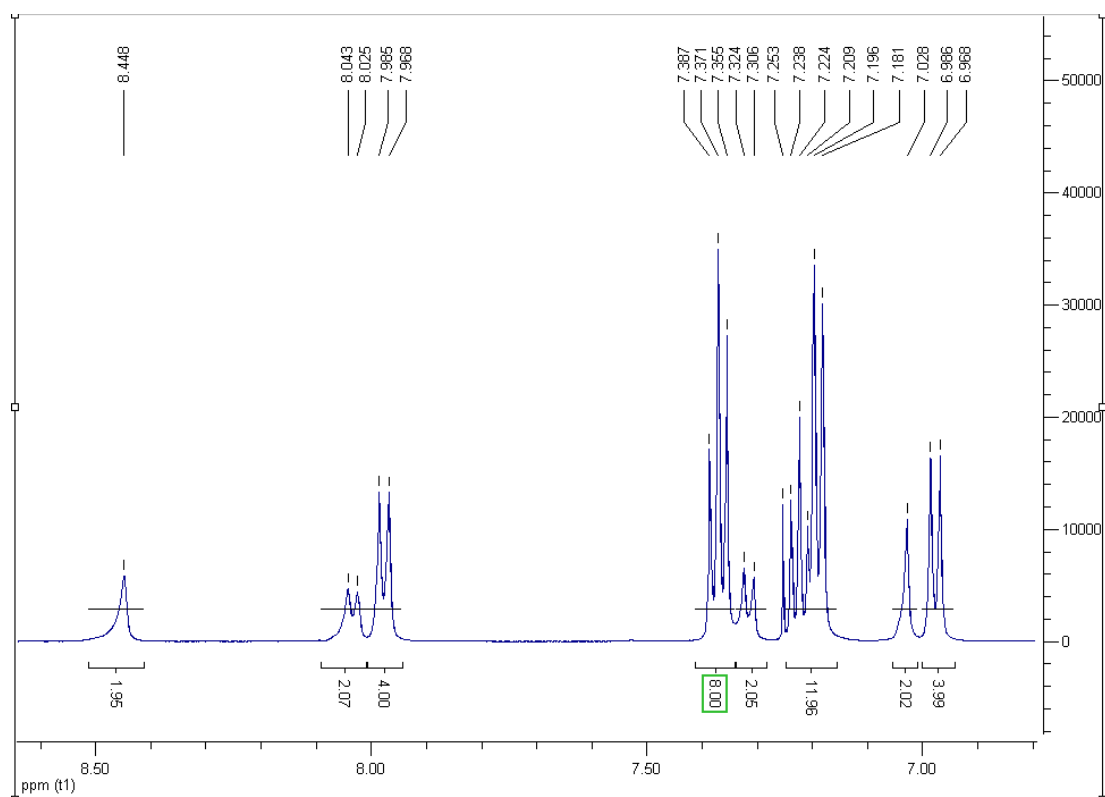

Fig. S10  $^1H$  NMR (500 MHz) spectrum of compound BDOBC16.



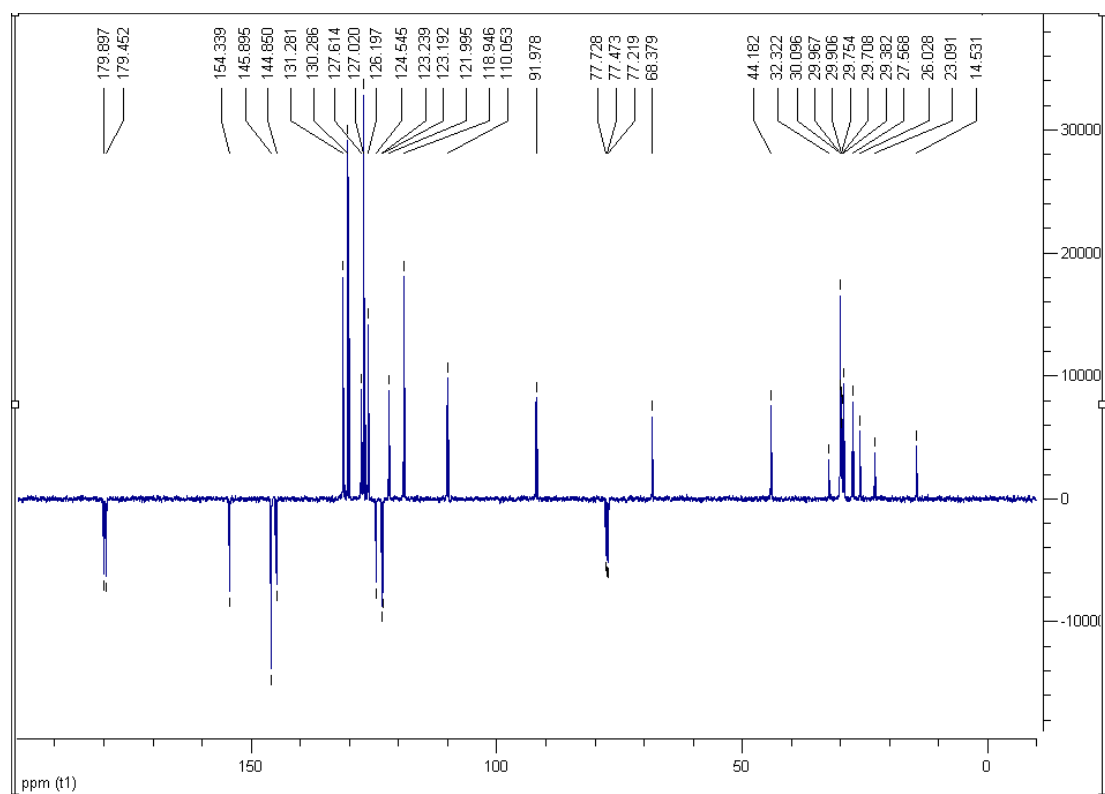

**Fig. S11**  $^{13}\text{C}$  NMR (125 MHz) spectrum of compound **BDOBC16**.

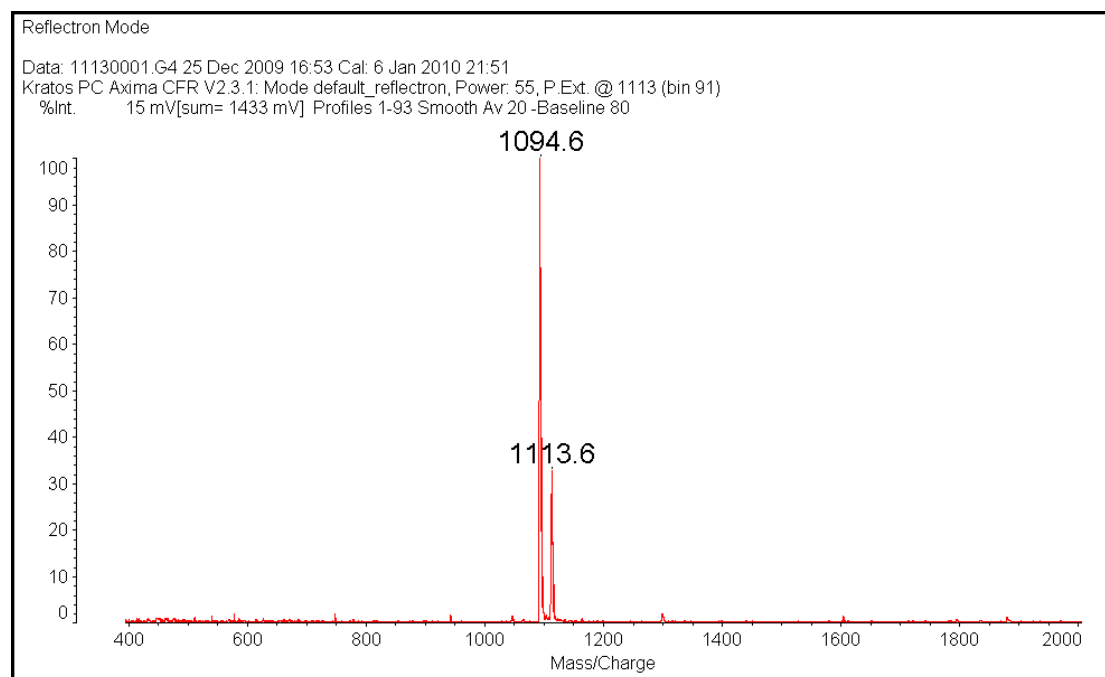

**Fig. S12** MALDI/TOF MS spectrum of compound **BDOBC16**.

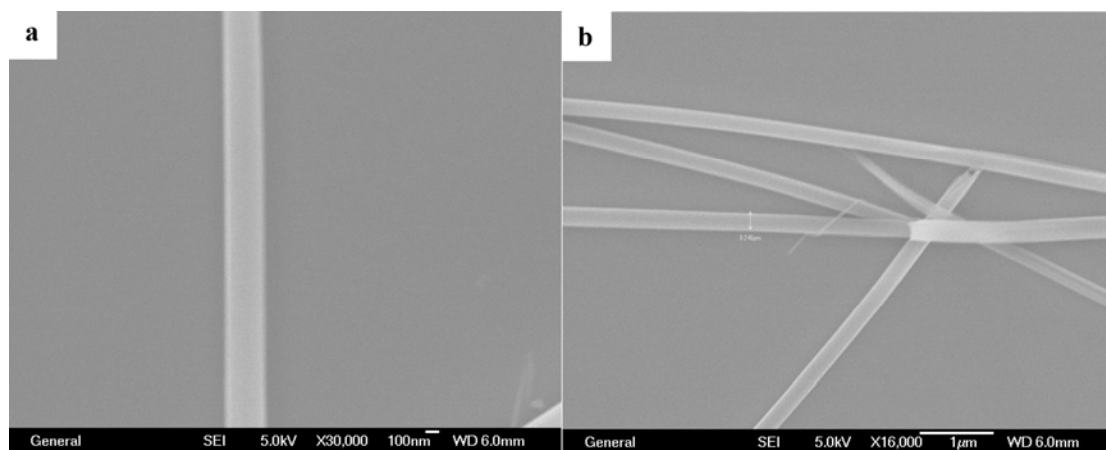

**Fig. S13** SEM images of the nanowires based on **BDOBC4**.

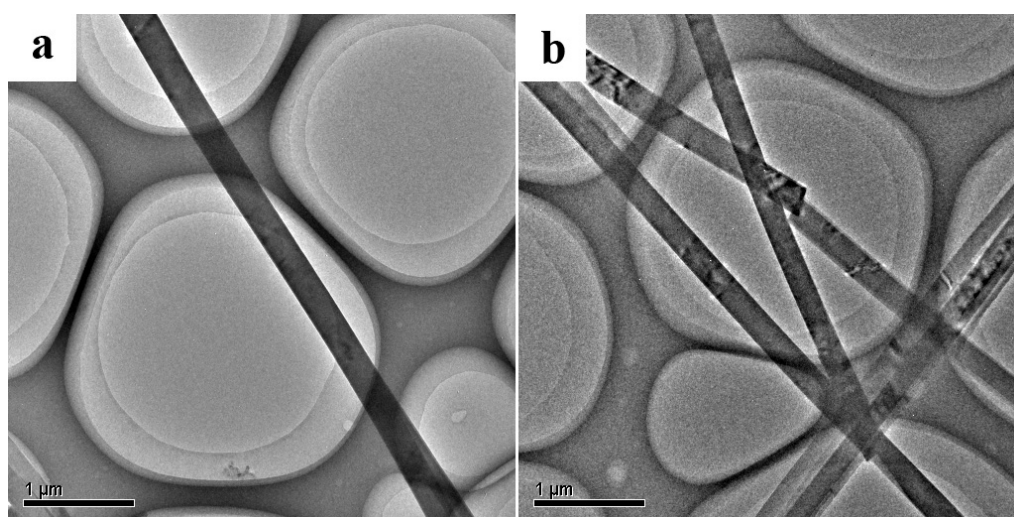

**Fig. S14** TEM image of the nanowires based on **BDOBC4**, the broken nanowire in (b) demonstrates the belt-like geometry of the cross-section.

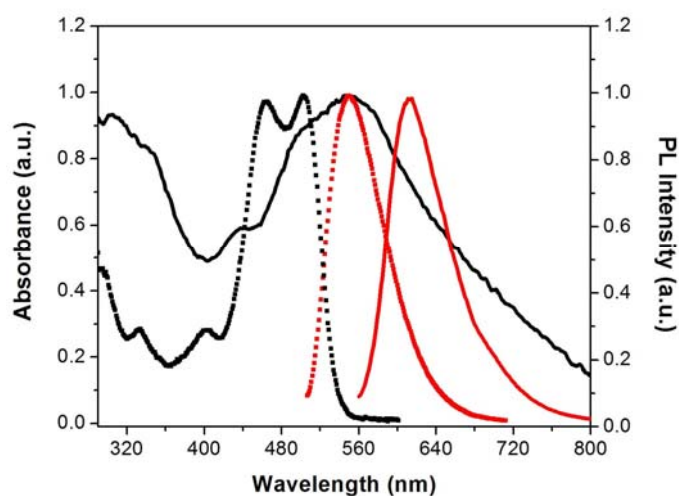

**Fig. S15** The normalized UV/Vis absorption (black) and fluorescence (red,  $\lambda_{\text{ex}} = 504$  nm) spectra of **BDOBC4** in toluene ( $1 \times 10^{-6}$  M, dashed) and the nanowires based on **BDOBC4** deposited on quartz slide (solid). The raised baseline for the absorption spectrum of nanowires is primarily due to the light scattering.

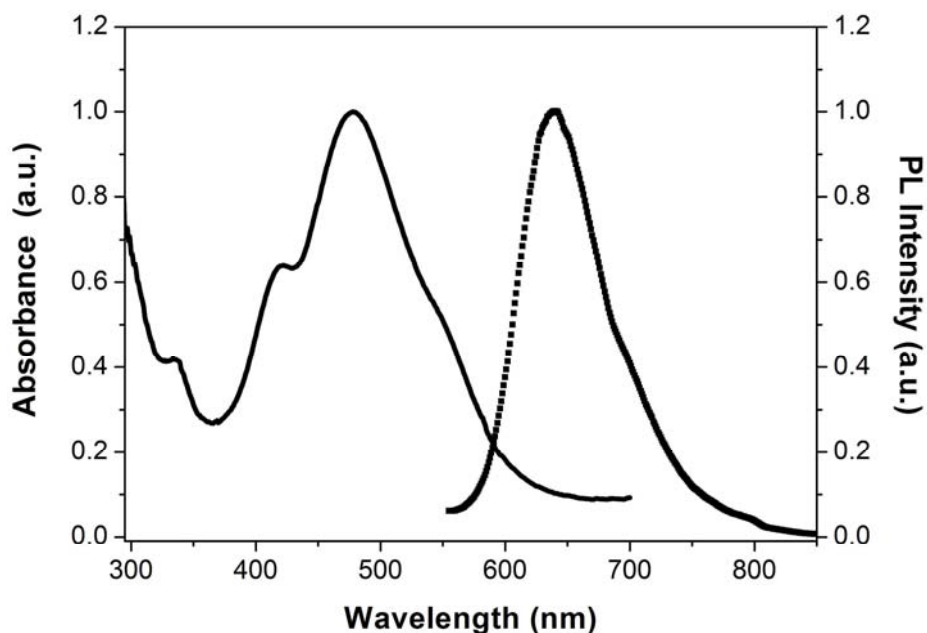

**Fig. S16** The normalized UV/Vis absorption (solid) and fluorescence (dashed,  $\lambda_{\text{ex}} = 478$  nm) spectra of the xerogel film based on **BDOBC16**.

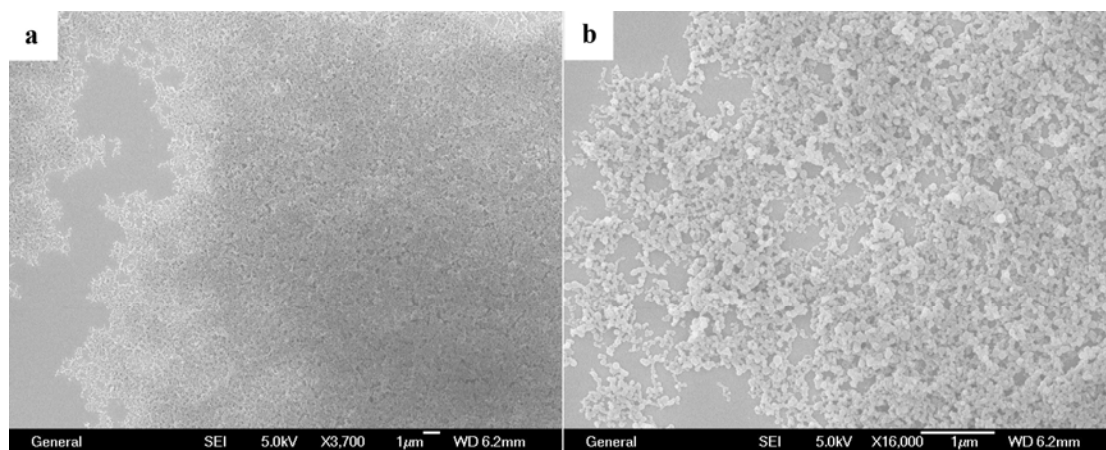

**Fig. S17** SEM images of the nanoparticles based on **BDOBC8** on silicon wafer.

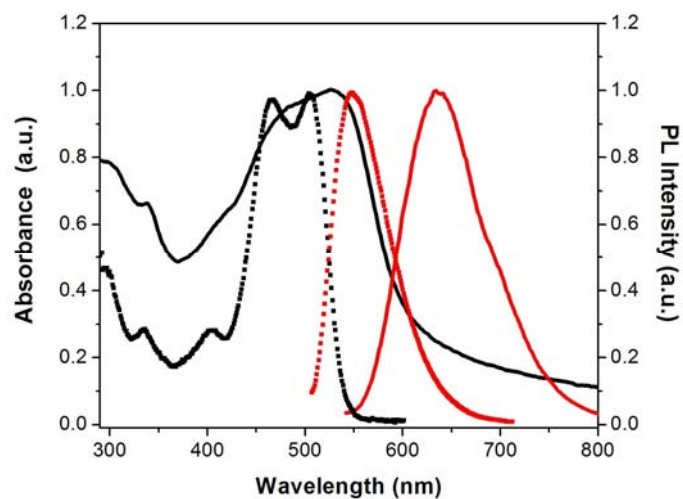

**Fig. S18** The normalized UV/Vis absorption (black) and fluorescence (red,  $\lambda_{\text{ex}} = 504$  nm) spectra of **BDOBC8** in toluene ( $1 \times 10^{-6}$  M, dashed) and the nanoparticles based on **BDOBC8** deposited on quartz slide (solid).

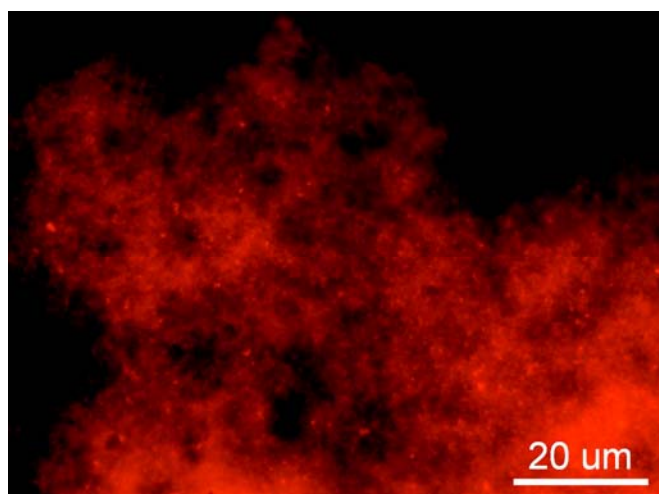

**Fig. S19** Fluorescence microscopy image of **BDOBC8**-based nanoparticles obtained by precipitation approach ( $\lambda_{\text{ex}} = 510\text{-}550\text{ nm}$ ).

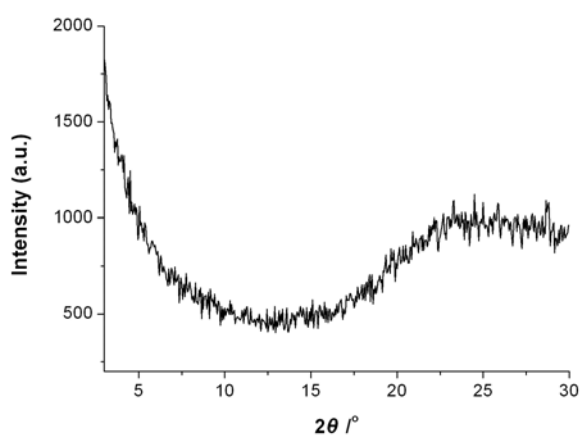

**Fig. S20** X-ray diffraction pattern of the nanoparticles based on **BDOBC8** deposited on glass.

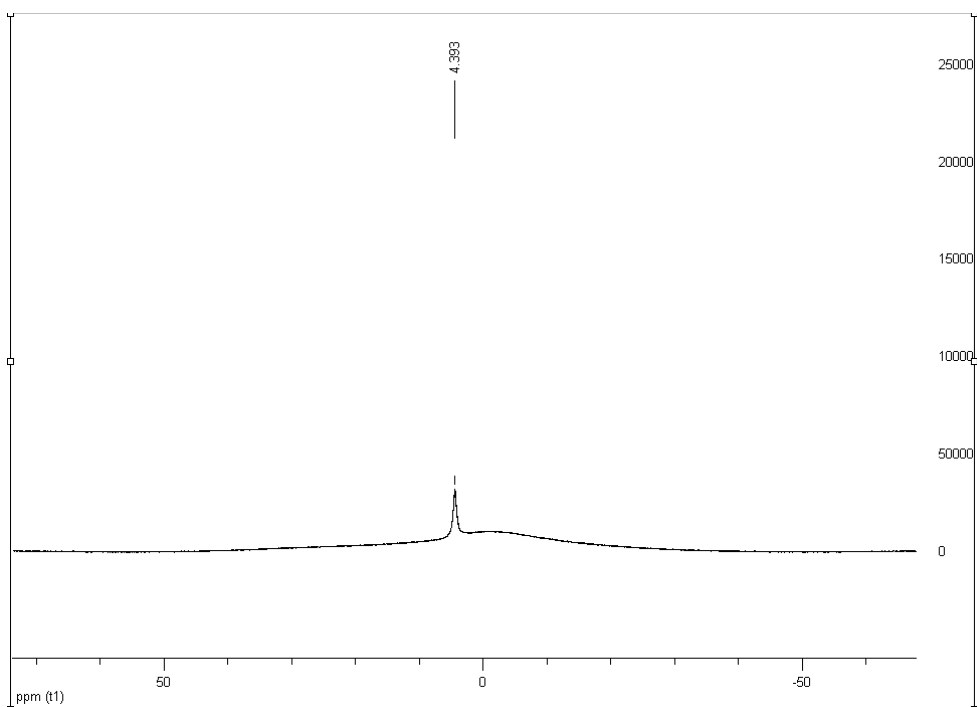

**Fig. S21**  $^{11}\text{B}$  NMR (160.4 MHz) spectrum of compound **BDOBC16**.

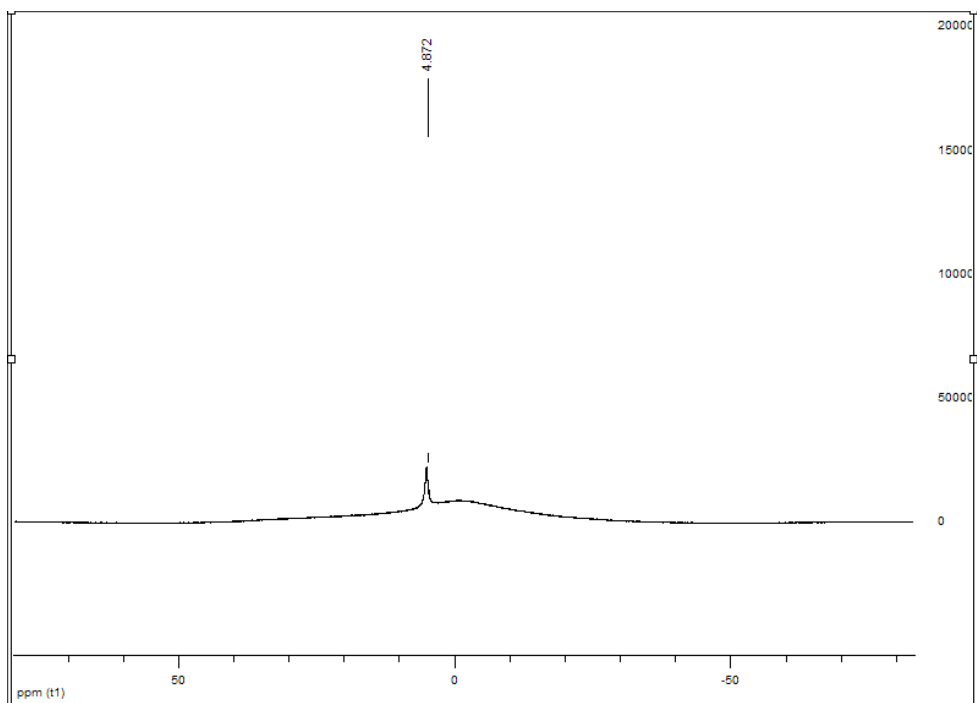

**Fig. S22**  $^{11}\text{B}$  NMR (160.4 MHz) spectrum of compound **BDOBC16** after adding aniline.

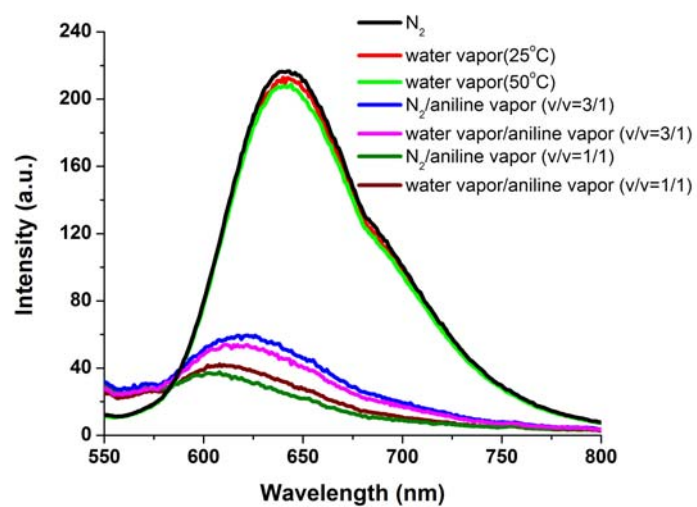

**Fig. S23** Fluorescence response of the nanofiber-based film from **BDOBC16** upon exposure to the different vapors for 10 s.

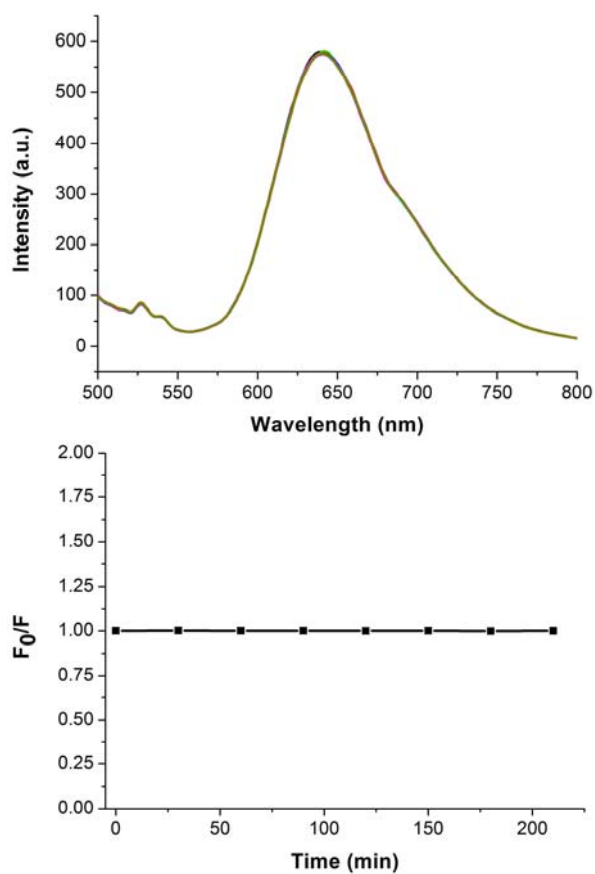

**Fig. S24** Time-dependent fluorescence spectra (top,  $\lambda_{ex} = 640$  nm) and the plot of the ratio of fluorescent intensity at 640 nm (down) before and after exposing the nanofiber-based film from **BDOBC16** to air with the interval of 30 min at room temperature.



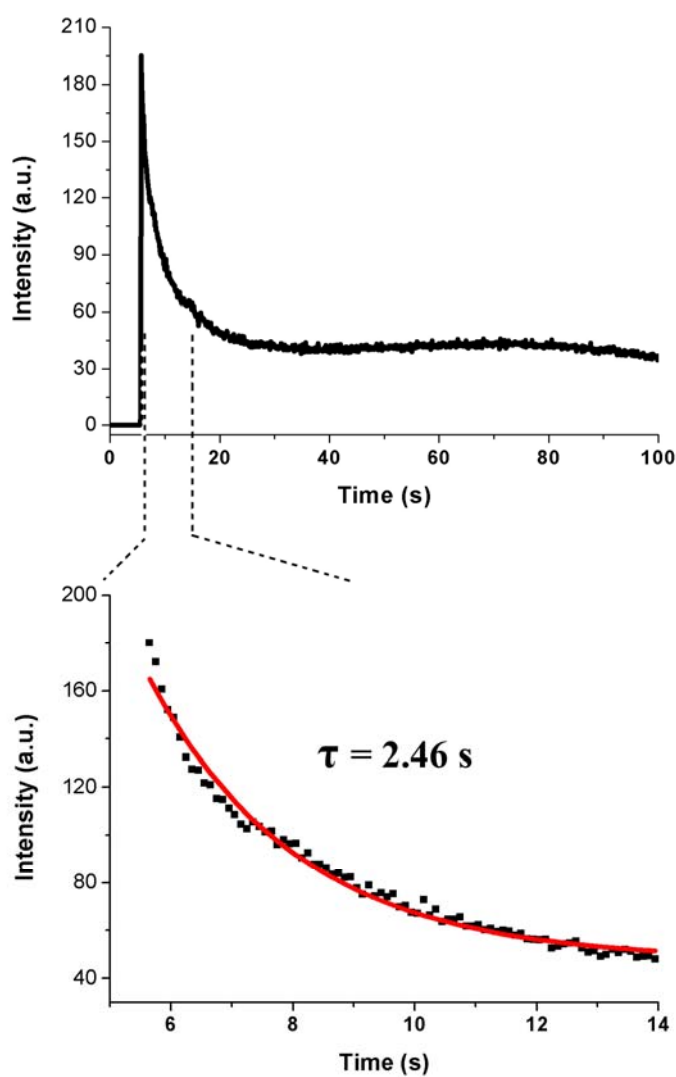

**Fig. S25** Time-course of fluorescence quenching of the nanoparticle-based film from **BDOBC8** after been added into the cell filled with saturated vapor of aniline (880 ppm), indicating a response time of about 2.46 s. The intensity was monitored at 635 nm.

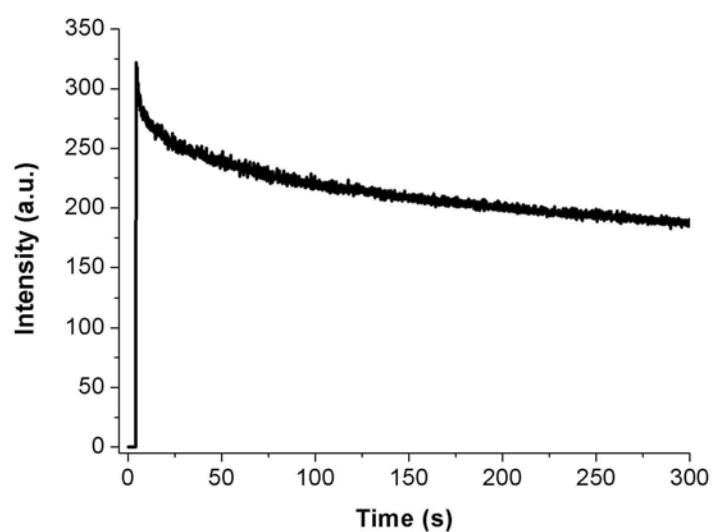

**Fig. S26** Time-course of fluorescence quenching of a nanowire-based film of **BDOBC4** after been added into the cell filled with saturated vapor of aniline (880 ppm). The intensity was monitored at 613 nm.

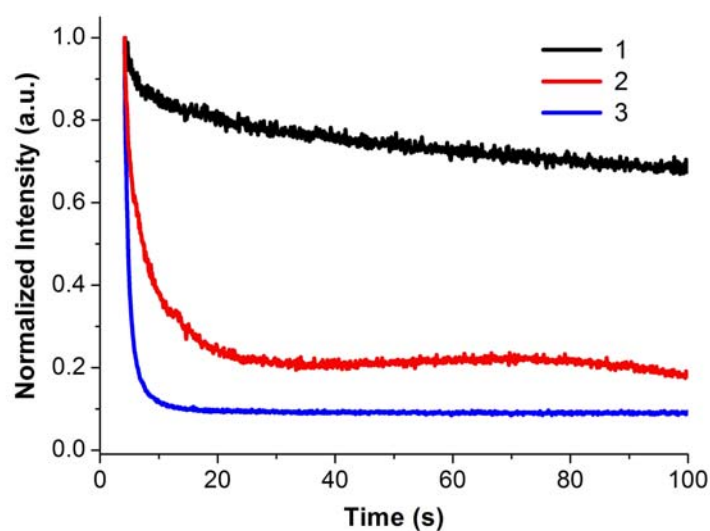

**Fig. S27** Normalized time-course of fluorescence quenching of the films after been added into the cell filled with saturated vapor of aniline (880 ppm): 1) nanowire-based film of **BDOBC4**; 2) nanoparticle-based film of **BDOBC8**; 3) gel nanofiber-based film of **BDOBC16**. The intensity was monitored at 613, 635 and 640 nm, respectively.
